# Supplementary material for: Ultrahigh conductivity and antifreezing zwitterionic sulfobetaine hydrogel electrolyte for low-temperature resistance flexible supercapacitors
Source: Royal Society of Chemistry journal article supplement (doi:10.1039/d3ta00835e), 2023-01-01
Supplement: d3ta00835e1.pdf [file d3ta00835e1.pdf]

## Supporting Information

### **Ultrahigh conductivity and antifreezing zwitterionic sulfobetaine hydrogel electrolyte for low-temperature resistance flexible supercapacitors**

Geliang Zhang, Xinguo Yang,\* Honghao Shu, Wenbin Zhong\*

College of Materials Science and Engineering, Hunan University, Changsha, 410082,

P. R. China

\* Corresponding author, Email: [wbzhong@hnu.edu.cn](mailto:wbzhong@hnu.edu.cn).

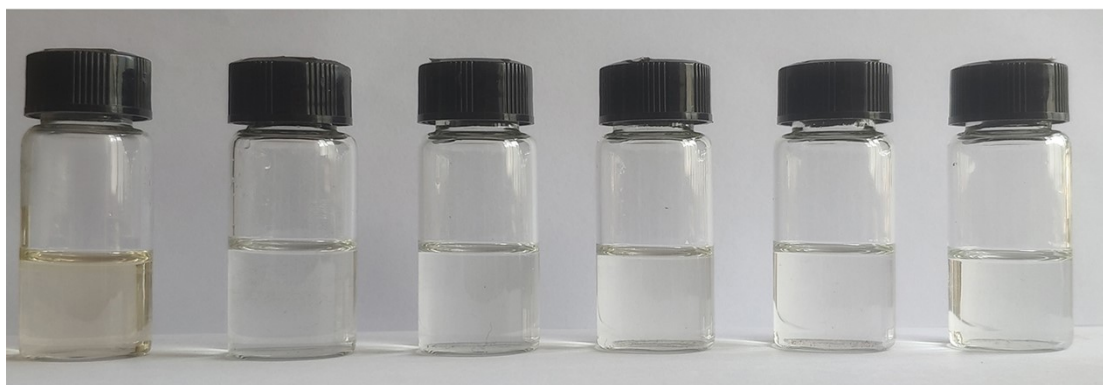

**before reaction**

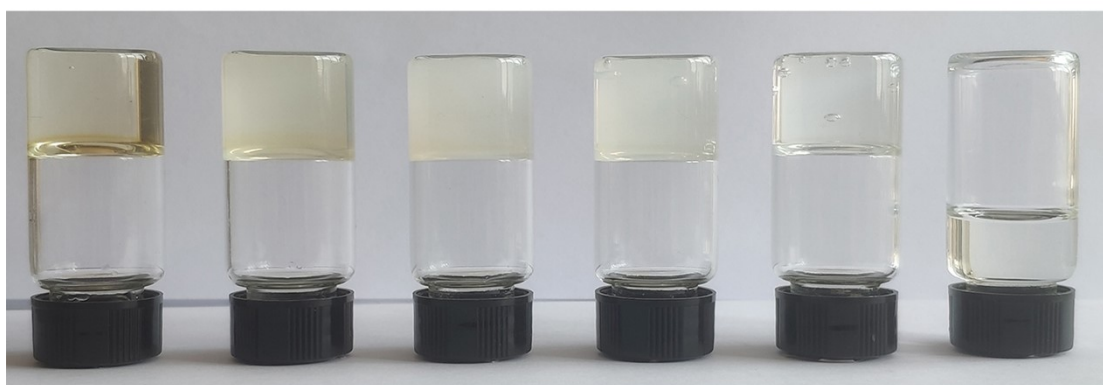

**after reaction**

**Fig S1.** Images left to right showing the hydrogels before and after the reaction (PHEAA, PSH<sub>2-8</sub>, PSH<sub>4-6</sub>, PSH<sub>6-4</sub>, PSH<sub>8-2</sub> and PSBMA)

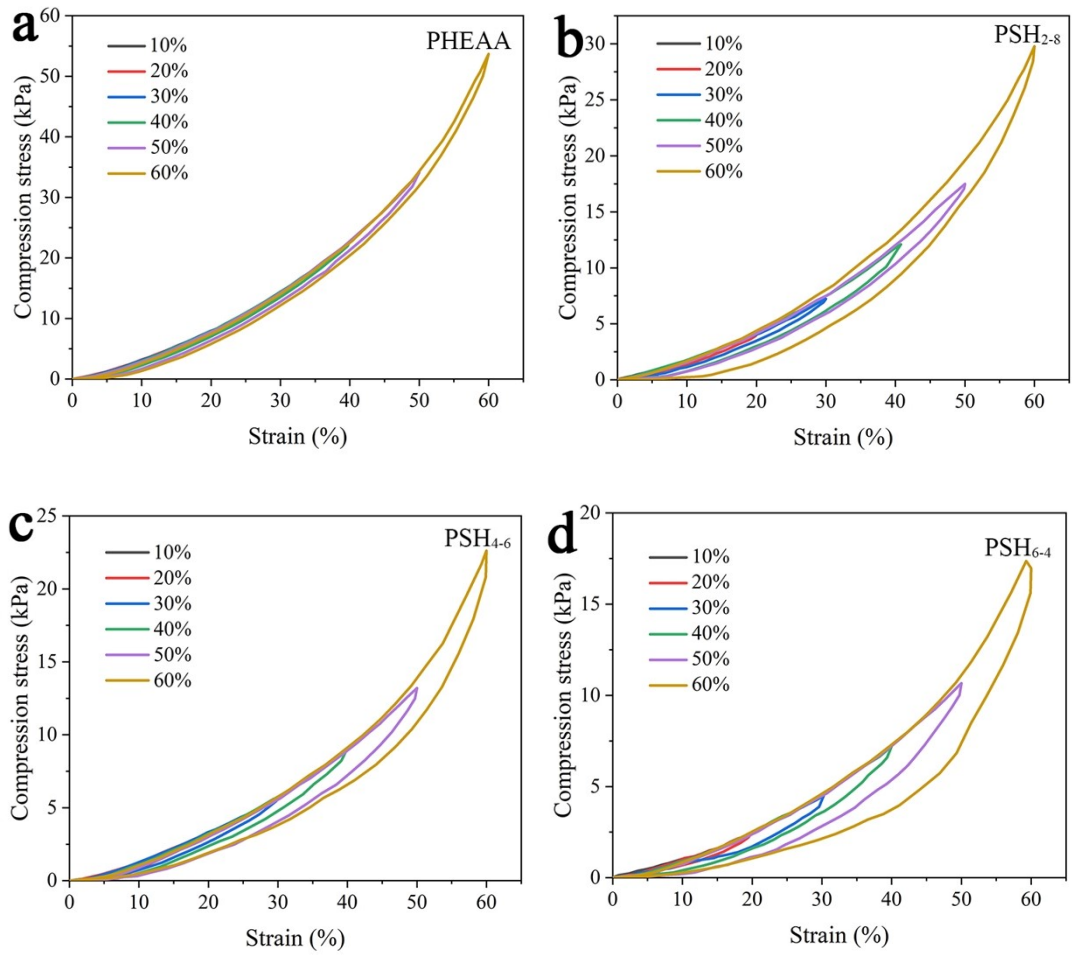

**Fig S2.** Compressive stress-strain curves of (a) PHEAA, (b) PSH<sub>2-8</sub>, (c) PSH<sub>4-6</sub>, (d) PSH<sub>6-4</sub>.

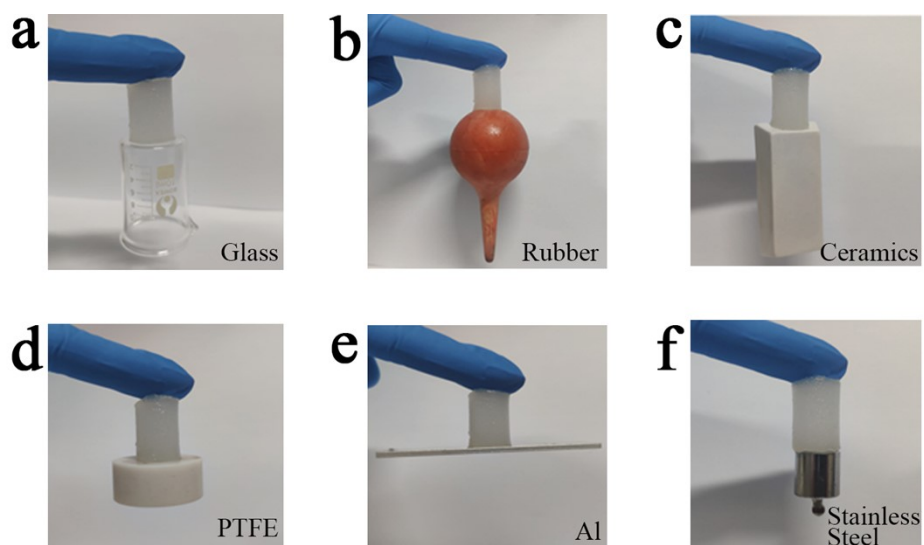

**Fig S3.** Hydrogels adhered to various materials (a) glass, (b) rubber, (c) ceramics, (d) PTFE, (e) Al, (f) stainless steel.

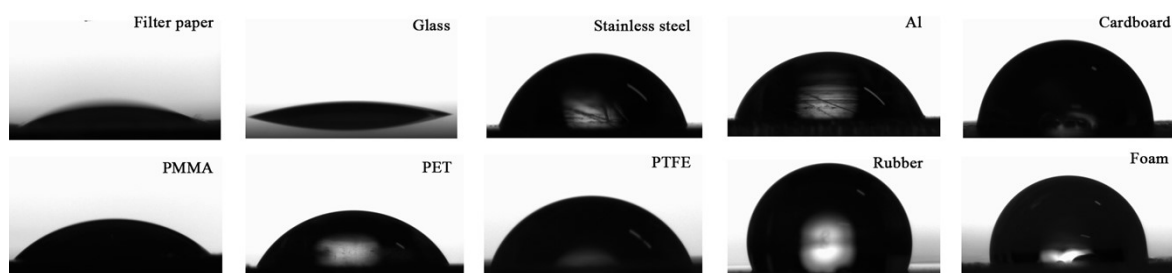

**Fig S4.** Contact angle of water droplet on different substrates

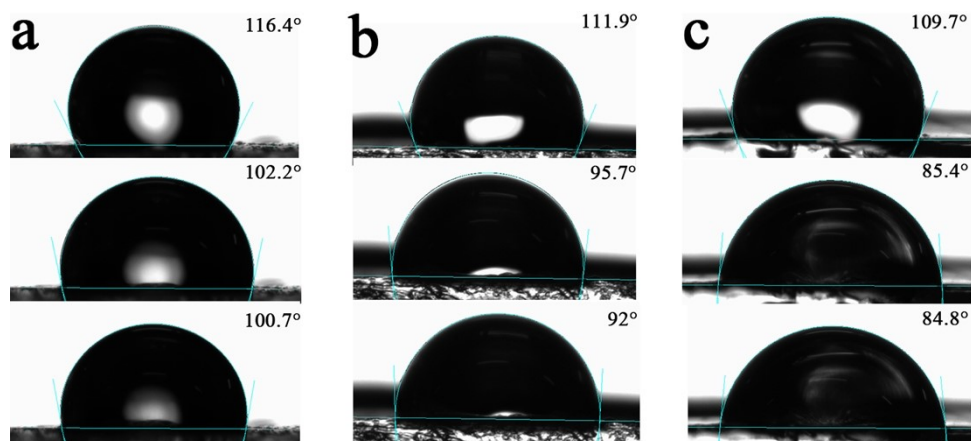

**Fig S5.** Change of contact angles of water at 0 second, 10 seconds and 15 seconds for different hydrogel, (a) PSH<sub>2-8</sub>, (b) PSH<sub>4-6</sub>, (c) PSH<sub>6-4</sub>.

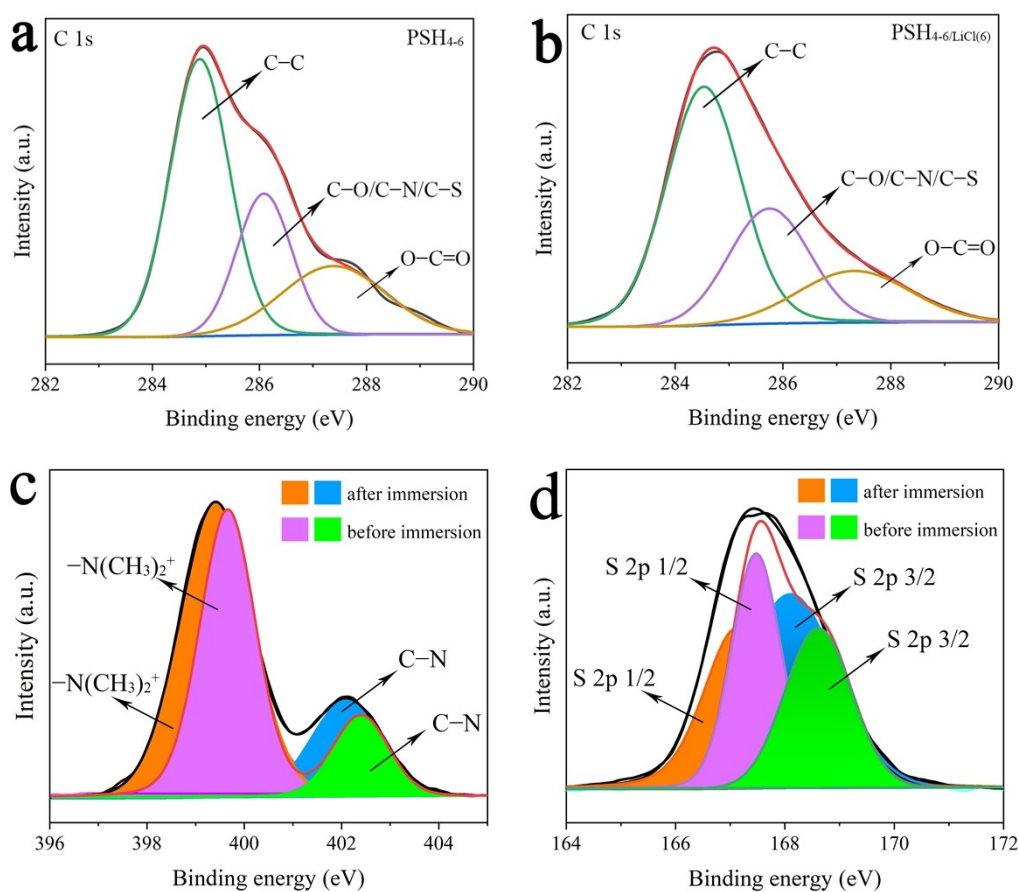

**Fig S6.** C 1s spectra of (a) PSH<sub>4-6</sub> and (b) PSH<sub>4-6</sub>/LiCl(6). (c) N 1s and (d) S 2p spectra of PSH<sub>4-6</sub> and PSH<sub>4-6</sub>/LiCl(6) for comparison.

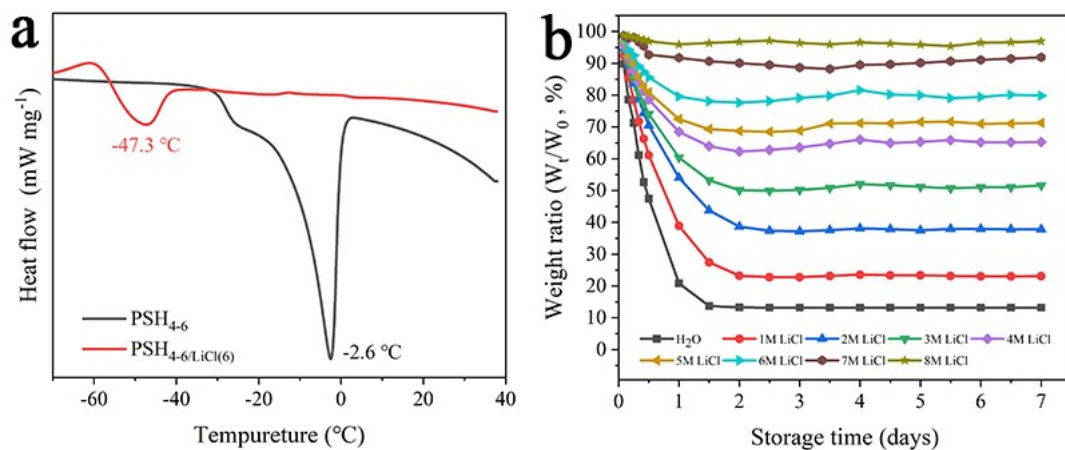

**Fig S7.** (a) DSC results of PSH<sub>4-6</sub> hydrogel without and with 6 M LiCl. (b) Water loss rate of PSH<sub>4-6</sub> hydrogels after immersing in different concentrations of LiCl solution at room temperature.

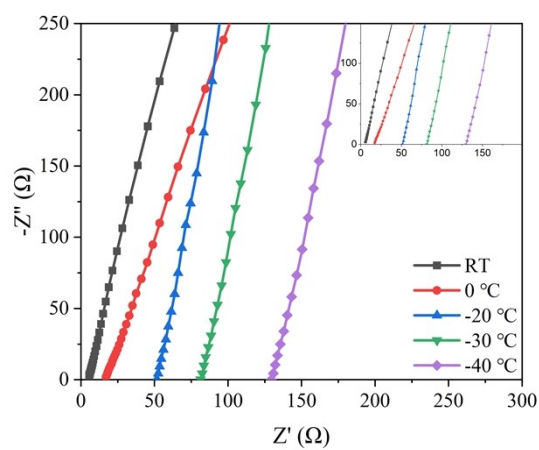

**Fig S8.** The EIS curves of PHEAA/LiCl(6) hydrogels at different temperatures.

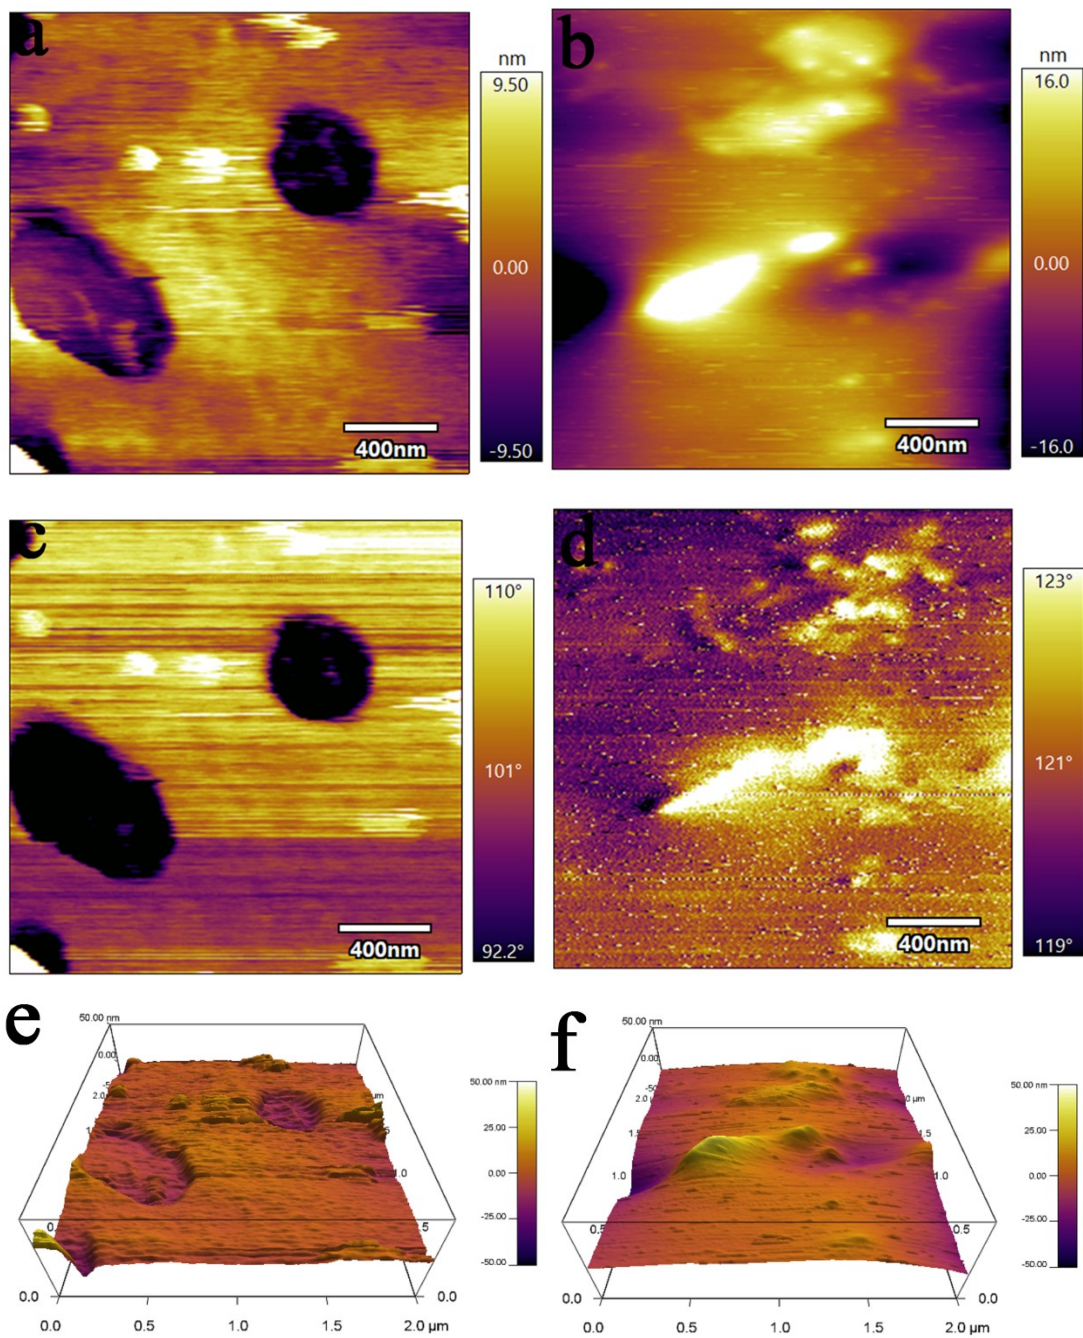

**Fig S9.** In-situ AFM graph of PSH<sub>4-6</sub> hydrogel without/with 6 M LiCl at the same location. The height retrace (a), phase retrace (c) and 3D images (e) of PSH<sub>4-6</sub> hydrogel.

The corresponding graph of PSH<sub>4-6</sub>/LiCl(6) ((b) (d) (f)).

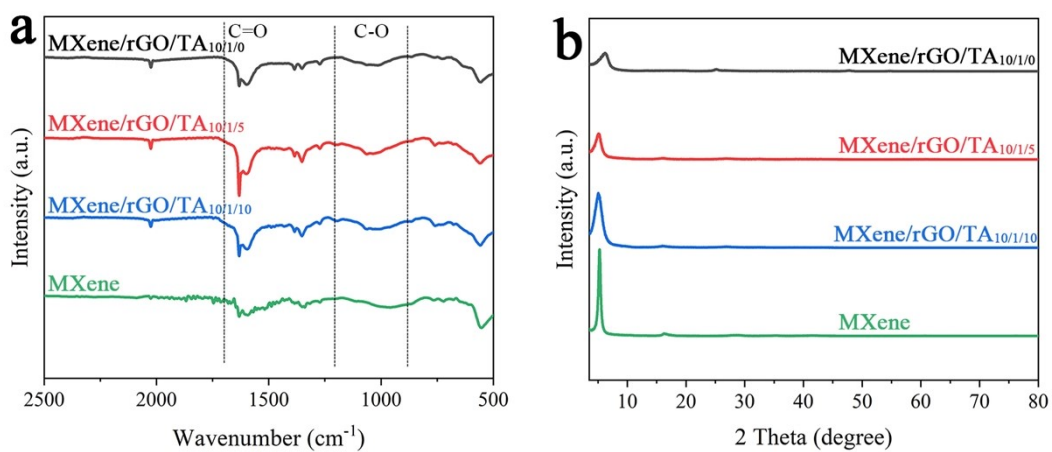

**Fig S10.** (a) FTIR spectra and (b) XRD spectra of  $\text{Ti}_3\text{C}_2\text{T}_x/\text{rGO}/\text{TA}$  composite films.

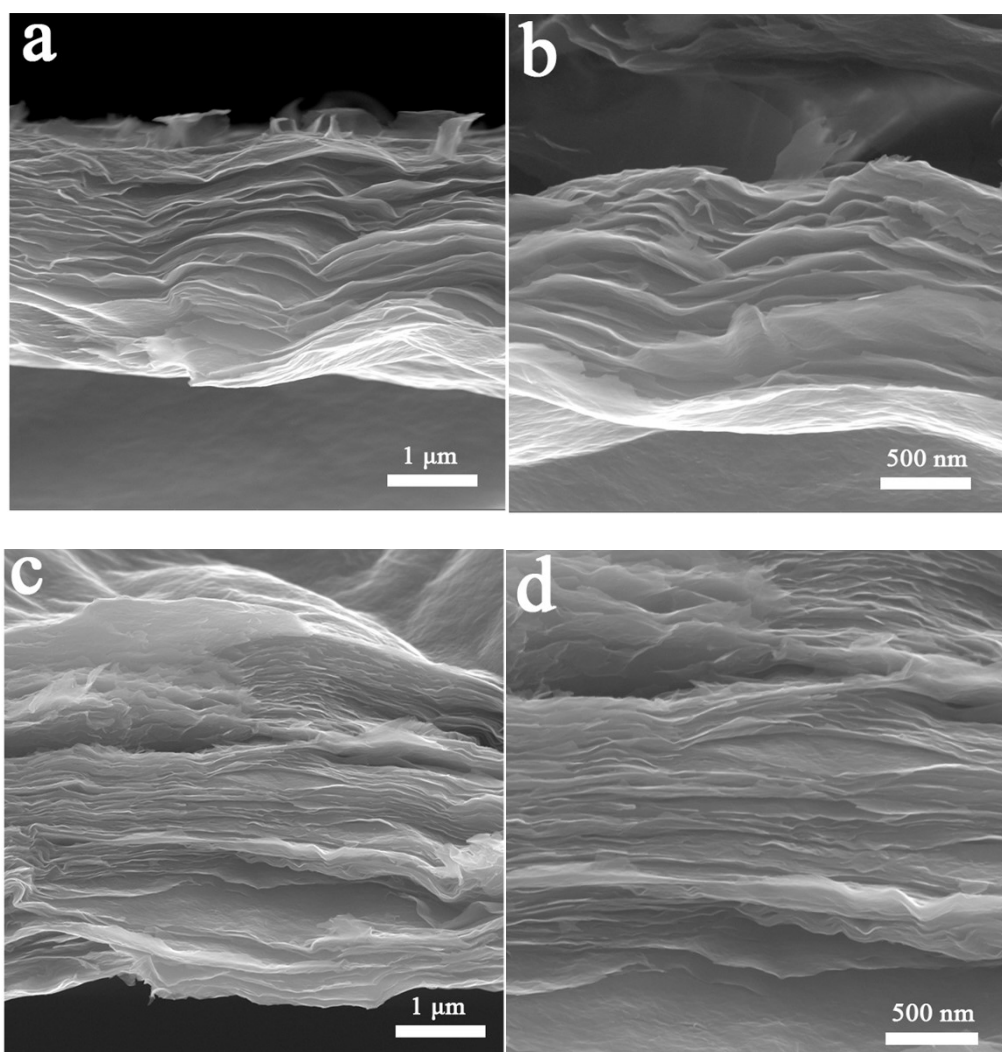

**Fig S11.** SEM images of  $\text{Ti}_3\text{C}_2\text{T}_x/\text{rGO}/\text{TA}_{10/1/0}$  (a and b),  $\text{Ti}_3\text{C}_2\text{T}_x/\text{rGO}/\text{TA}_{10/1/5}$  (c and d).



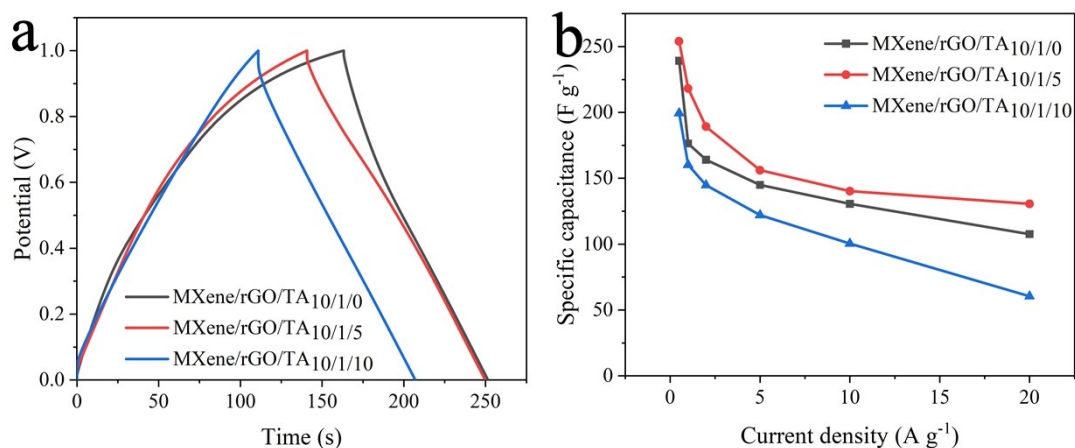

**Fig S12.** Electrochemical properties of supercapacitor constructed with as-prepared film. (a) GCD curves at a current density of 1 A g<sup>-1</sup>. (b) Specific capacitance versus different current densities (1-20 A g<sup>-1</sup>)

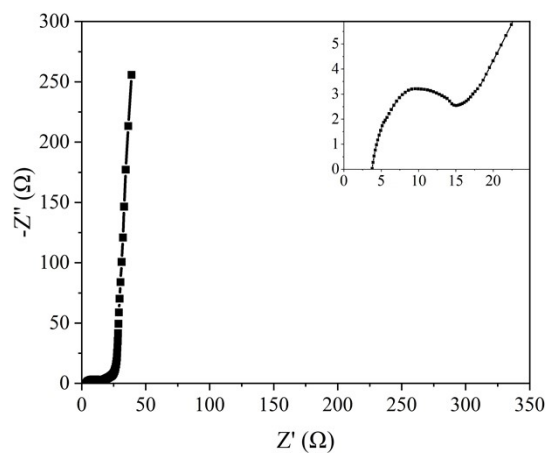

**Fig S13.** The EIS curves of flexible supercapacitors at room temperature.

**Table S1.** Different molar ratio hydrogels S 2p XPS data

| Sample                      | S 2p 1/2    | S 2p 3/2    | Area ratio |
|-----------------------------|-------------|-------------|------------|
| PSH <sub>2-8</sub>          | 167.64 (eV) | 168.79 (eV) | 1.054      |
| PSH <sub>4-6</sub>          | 167.47 (eV) | 168.61 (eV) | 1.135      |
| PSH <sub>6-4</sub>          | 167.33 (eV) | 168.47 (eV) | 1.326      |
| SBMA                        | 167.18 (eV) | 168.38 (eV) | 1.553      |
| PSH <sub>4-6</sub> /LiCl(6) | 167.15 (eV) | 168.20 (eV) | 0.756      |

**Table S2.** Summary of ionic conductivity of different conductive hydrogel at room temperature.

| Components        | Conducting ions       | Conductivity (S m <sup>-1</sup> ) | Refs     |
|-------------------|-----------------------|-----------------------------------|----------|
| SBMA-HEA          | LiCl                  | 14.6                              | 1        |
| SBMA-PAM          | NaCl                  | 3.674                             | 2        |
| SBMA-CNF          | ZnSO <sub>4</sub>     | 2.46                              | 3        |
| SBMA-PVA-PAM      | ZnCl <sub>2</sub>     | 1.57                              | 4        |
| PVA-Thioctic acid | AlCl <sub>3</sub>     | ~0.23                             | 5        |
| TBOT-BA           | LiTFSI                | 0.134                             | 6        |
| PAMPS-PAAm        | LiCl                  | 2.29                              | 7        |
| PVA-CNF           | NaCl                  | 3.2                               | 8        |
| PAMPS-MC          | KOH                   | 10.5                              | 9        |
| PAO/PEI           | KOH                   | 22.35                             | 10       |
| PVA/glycerol      | CH <sub>3</sub> COONa | 8.127                             | 11       |
| SBMA-HEAA         | LiCl                  | 25.8                              | Our Work |

**Table S3.** Summary of antifreezing hydrogel electrolytes and supercapacitors

| Electrode material                                    | Electrolyte components                       | Conductivity (S m <sup>-1</sup> ) | Capacitance                                               | Refs        |
|-------------------------------------------------------|----------------------------------------------|-----------------------------------|-----------------------------------------------------------|-------------|
| Activated carbon                                      | SBMA-HEA/LiCl                                | 1.26 at -40°C                     | 134 mF cm <sup>-2</sup> at -30°C                          | 12          |
| Activated carbon                                      | SBMA-AA/ZnCl <sub>2</sub>                    | 1.56 at -60°C                     | ~50 F g <sup>-1</sup> (0.5 A g <sup>-1</sup> ) at -60°C   | 13          |
| Activated carbon                                      | SBMA-AM/EG                                   | 0.151 at -50°C                    | 62 F g <sup>-1</sup> (62.5 mA g <sup>-1</sup> ) at -50°C  | 14          |
| Activated carbon                                      | SBMA-AM-AMPS                                 | 3.4 at room temperature           | 12.5 F g <sup>-1</sup> (0.5 A g <sup>-1</sup> ) at -10°C  | 15          |
| Carbon nanotubes                                      | PVA/P(SBMA-AM)/ CaCl <sub>2</sub>            | 0.28 at -40°C                     | -                                                         | 16          |
| -                                                     | SBMA-AM-PVA/LiCl                             | 7.95 at -45.3°C                   | -                                                         | 17          |
| Polypyrrole                                           | MMT-AM/EMIMBF <sub>4</sub>                   | 0.518 at -30°C                    | ~35 mF cm <sup>-2</sup> at -30°C                          | 18          |
| Polyaniline                                           | PVA/H <sub>2</sub> SO <sub>4</sub> /Glycerol | 1.71 at -40°C                     | 268 mF cm <sup>-2</sup> at -20°C                          | 19          |
| Graphene                                              | VC-PVA PEDOT:PSS/EG                          | 4.0 at -30°C                      | 212.6 F g <sup>-1</sup> (0.1 A g <sup>-1</sup> ) at -20°C | 20          |
| Activated carbon                                      | HPC/PVA/ Glycerol/LiClO <sub>4</sub>         | 0.57 at -40°C                     | 143.6 F g <sup>-1</sup> (2 A g <sup>-1</sup> ) at -40°C   | 21          |
| Graphene                                              | PVA/EG/Zn(Tf) <sub>2</sub>                   | 0.353 at -40°C                    | 202.8 F g <sup>-1</sup> (0.2 A g <sup>-1</sup> ) at -20°C | 22          |
| Activated carbon                                      | Carrageenan-PVA/EG                           | 3.18 at -40°C                     | 113.6 F g <sup>-1</sup> (3 A g <sup>-1</sup> ) at -40°C   | 23          |
| Activated carbon                                      | Carrageenan-AM/LiCl/KCl                      | 1.9 at -40°C                      | 73.4 F g <sup>-1</sup> (1 A g <sup>-1</sup> ) at -40°C    | 24          |
| Activated carbon                                      | PAMPS-AM/EG                                  | 0.1 at -30°C                      | 55.5 F g <sup>-1</sup> (1 A g <sup>-1</sup> ) at -20°C    | 25          |
| Activated carbon                                      | Silk backbone/<br>EG/ChCl/ZnCl <sub>2</sub>  | 0.363 at -20°C                    | 242.9 F g <sup>-1</sup> (0.2 A g <sup>-1</sup> ) at -18°C | 26          |
| Ti <sub>3</sub> C <sub>2</sub> T <sub>x</sub> /rGO/TA | SBMA-HEAA/LiCl                               | 2.21 at -40°C                     | 133 F g <sup>-1</sup> (0.5 A g <sup>-1</sup> ) at -40°C   | Our<br>Work |

## References

1. J. Yang, Z. Xu, J. Wang, L. Gai, X. Ji, H. Jiang and L. Liu, *Adv. Funct. Mater.*, 2021, **31**, 2009438.
2. B. Yang and W. Yuan, *ACS Appl. Mater. Interfaces*, 2019, **11**, 40620-40628.
3. F. Mo, Z. Chen, G. Liang, D. Wang, Y. Zhao, H. Li, B. Dong and C. Zhi, *Adv. Energy Mater.*, 2020, **10**, 2000035.
4. Z. Zhou, Z. He, S. Yin, X. Xie and W. Yuan, *Composites Part B*, 2021, **220**, 108984.
5. D. Pei, S. Yu, X. Zhang, Y. Chen, M. Li and C. Li, *Chem. Eng. J.*, 2022, **445**, 136741.
6. S. Wang, M. Bai, C. Liu, G. Li, X. Lu, H. Cai, C. Liu and W.-Y. Lai, *Chem. Eng. J.*, 2022, **440**, 135824.
7. X. Li, D. Lou, H. Wang, X. Sun, J. Li and Y. N. Liu, *Adv. Funct. Mater.*, 2020, **30**, 2007291.
8. Y. Ye, Y. Zhang, Y. Chen, X. Han and F. Jiang, *Adv. Funct. Mater.*, 2020, **30**, 2003430.
9. N. Sun, F. Lu, Y. Yu, L. Su, X. Gao and L. Zheng, *ACS Appl. Mater. Interfaces*, 2020, **12**, 11778-11788.
10. X. Guo, Y. Lu, D. Fu, C. Yu, X. Yang and W. Zhong, *Chem. Eng. J.*, 2023, **452**, 139208.
11. G. Li, X. Zhang, M. Sang, X. Wang, D. Zuo, J. Xu and H. Zhang, *J. Energy*

- Storage*, 2021, **33**, 101931.
12. J. Yang, Z. Xu, J. Wang, L. Gai, X. Ji, H. Jiang and L. Liu, *Adv. Funct. Mater.*, 2021, **31**, 2009438.
  13. Q. Fu, S. Hao, L. Meng, F. Xu and J. Yang, *ACS Nano*, 2021, **15**, 18469-18482.
  14. W. Sun, Z. Xu, C. Qiao, B. Lv, L. Gai, X. Ji, H. Jiang and L. Liu, *Adv. Sci.*, 2022, **9**, 2201679.
  15. W. Diao, L. Wu, X. Ma, L. Wang, X. Bu, W. Ni, X. Yang and Y. Fang, *J. Appl. Polym. Sci.*, 2020, **137**, 48995.
  16. O. D. Hu, J. Lu, S. Weng, L. X. Hou, X. Zhang and X. C. Jiang, *Polymer*, 2022, **254**, 125109.
  17. Y. Wang, P. Chen, X. Zhou, Y. Liu, N. Wang and C. Gao, *ACS Appl. Mater. Interfaces*, 2022, **14**, 47100-47112.
  18. Q. Hu, S. Cui, K. Sun, X. Shi, M. Zhang, H. Peng and G. Ma, *J. Energy Storage*, 2022, **50**, 104231.
  19. K.-h. Zhu, X.-d. Han, S.-f. Ye, P.-x. Cui, L.-y. Dou, W.-b. Ma, X.-y. Tao, X.-y. Wei and S. Heng, *J. Energy Storage*, 2022, **53**, 105096.
  20. T. Xu, D. Yang, S. Zhang, T. Zhao, M. Zhang and Z.-Z. Yu, *Carbon*, 2021, **171**, 201-210.
  21. N. Lu, R. Q. Na, L. B. Li, C. Y. Zhang, Z. Q. Chen, S. L. Zhang, J. S. Luan and G. B. Wang, *ACS Appl. Energ. Mater.*, 2020, **3**, 1944-1951.
  22. J. Liu, Z. Khanam, S. Ahmed, T. Wang, H. Wang and S. Song, *ACS Appl. Mater. Interfaces*, 2021, **13**, 16454-16468.

23. Y. Yang, K.-P. Wang, Q. Zang, Q. Shi, Y. Wang, Z. Xiao, Q. Zhang and L. Wang, *J. Mater. Chem. A*, 2022, **10**, 11277-11287.
24. S. Wu, D. Lou, H. Wang, D. Jiang, X. Fang, J. Meng, X. Sun and J. Li, *Chem. Eng. J.*, 2022, **435**, 135057.
25. H. Wang, X. Li, D. Jiang, S. Wu, W. Yi, X. Sun and J. Li, *J. Power Sources*, 2022, **528**, 231210.
26. Z. Li, X. Xu, Z. Jiang, J. Chen, J. Tu, X. Wang and C. Gu, *ACS Appl. Mater. Interfaces*, 2022, **14**, 44821-44831.
